# Supplementary material
Source: PubMed Central journal article supplement (PMC2689155)

## SUPPORTING INFORMATION

### Cyclic Pyrrole-Imidazole Polyamides Targeted to the Androgen Response Element

*David M. Chenoweth, Daniel A. Harki, John W. Phillips, Christian Dose, and Peter B. Dervan\**  
Division of Chemistry and Chemical Engineering, California Institute of Technology, Pasadena, CA 91125

#### Table of Contents for Supporting Information

|                                                                                                                                                                                   | <i>Page</i> |
|-----------------------------------------------------------------------------------------------------------------------------------------------------------------------------------|-------------|
| Structures and lot numbers of polyamides <b>1</b> and <b>5</b> submitted for ADMET testing                                                                                        | S2          |
| Summary of ADMET data:                                                                                                                                                            |             |
| I. Caco-2 permeability                                                                                                                                                            | S2          |
| II. Cytotoxicity in HepG2 cells                                                                                                                                                   | S3          |
| III. Cyp inhibition                                                                                                                                                               | S3          |
| IV. hERG inhibition                                                                                                                                                               | S3          |
| V. Liver microsome stability                                                                                                                                                      | S4          |
| VI. Plasma half-life                                                                                                                                                              | S4          |
| VII. Plasma protein binding                                                                                                                                                       | S5          |
| <sup>1</sup> H NMR of BocHN-( <i>R</i> ) <sup>β</sup> -CbzHN <sub>γ</sub> -Im-CO <sub>2</sub> H ( <b>8</b> )                                                                      | S6          |
| <sup>13</sup> C NMR of BocHN-( <i>R</i> ) <sup>β</sup> -CbzHN <sub>γ</sub> -Im-CO <sub>2</sub> H ( <b>8</b> )                                                                     | S7          |
| <sup>1</sup> H NMR of BocHN-( <i>R</i> ) <sup>β</sup> -CbzHN <sub>γ</sub> -ImPyPyPy-CO <sub>2</sub> Me ( <b>9</b> )                                                               | S8          |
| <sup>13</sup> C NMR of BocHN-( <i>R</i> ) <sup>β</sup> -CbzHN <sub>γ</sub> -ImPyPyPy-CO <sub>2</sub> Me ( <b>9</b> )                                                              | S9          |
| <sup>1</sup> H NMR of HCl•H <sub>2</sub> N-( <i>R</i> ) <sup>β</sup> -CbzHN <sub>γ</sub> -ImPyPyPy-CO <sub>2</sub> Me ( <b>10</b> )                                               | S10         |
| <sup>13</sup> C NMR of HCl•H <sub>2</sub> N-( <i>R</i> ) <sup>β</sup> -CbzHN <sub>γ</sub> -ImPyPyPy-CO <sub>2</sub> Me ( <b>10</b> )                                              | S11         |
| <sup>1</sup> H NMR of BocHN-( <i>R</i> ) <sup>β</sup> -CbzHN <sub>γ</sub> -ImPyPyPy-CO <sub>2</sub> H ( <b>11</b> )                                                               | S12         |
| <sup>13</sup> C NMR of BocHN-( <i>R</i> ) <sup>β</sup> -CbzHN <sub>γ</sub> -ImPyPyPy-CO <sub>2</sub> H ( <b>11</b> )                                                              | S13         |
| <sup>1</sup> H NMR of BocHN-( <i>R</i> ) <sup>β</sup> -CbzHN <sub>γ</sub> -ImPyPyPy-( <i>R</i> ) <sup>β</sup> -CbzHN <sub>γ</sub> -ImPyPyPy-CO <sub>2</sub> Me ( <b>12</b> )      | S14         |
| <sup>13</sup> C NMR of BocHN-( <i>R</i> ) <sup>β</sup> -CbzHN <sub>γ</sub> -ImPyPyPy-( <i>R</i> ) <sup>β</sup> -CbzHN <sub>γ</sub> -ImPyPyPy-CO <sub>2</sub> Me ( <b>12</b> )     | S15         |
| <sup>1</sup> H NMR of BocHN-( <i>R</i> ) <sup>β</sup> -CbzHN <sub>γ</sub> -ImPyPyPy-( <i>R</i> ) <sup>β</sup> -CbzHN <sub>γ</sub> -ImPyPyPy-CO <sub>2</sub> H ( <b>13</b> )       | S16         |
| <sup>13</sup> C NMR of BocHN-( <i>R</i> ) <sup>β</sup> -CbzHN <sub>γ</sub> -ImPyPyPy-( <i>R</i> ) <sup>β</sup> -CbzHN <sub>γ</sub> -ImPyPyPy-CO <sub>2</sub> H ( <b>13</b> )      | S17         |
| <sup>1</sup> H NMR of BocHN-( <i>R</i> ) <sup>β</sup> -CbzHN <sub>γ</sub> -ImPyPyPy-( <i>R</i> ) <sup>β</sup> -CbzHN <sub>γ</sub> -ImPyPyPy-CO <sub>2</sub> Pfp ( <b>14</b> )     | S18         |
| <sup>1</sup> H NMR of cyclo-(ImPyPyPy-( <i>R</i> ) <sup>β</sup> -H <sub>2</sub> N <sub>γ</sub> -ImPyPyPy-( <i>R</i> ) <sup>β</sup> -H <sub>2</sub> N <sub>γ</sub> -) ( <b>1</b> ) | S19         |
| Analytical HPLC Characterization of Cyclic Polyamide <b>15</b>                                                                                                                    | S20         |
| Analytical HPLC Characterization of Cyclic Polyamide <b>1</b>                                                                                                                     | S20         |
| Analytical HPLC Characterization of Cyclic Polyamide <b>2</b>                                                                                                                     | S20         |
| Analytical HPLC Characterization of Cyclic Polyamide <b>3</b>                                                                                                                     | S21         |
| Analytical HPLC Characterization of Hairpin Polyamide <b>5</b>                                                                                                                    | S21         |

**Polyamides submitted for ADMET evaluation by Apredica, LLC (Watertown, MA):**

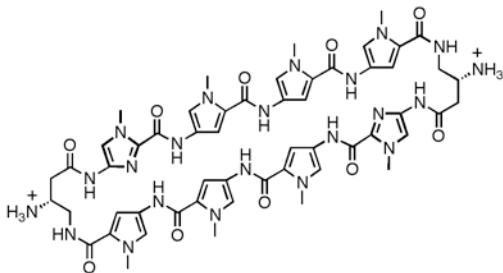

*Cyclic polyamide 1 (as shown in accompanying manuscript)*  
 Denoted as **DMC2-239** on ADMET Report

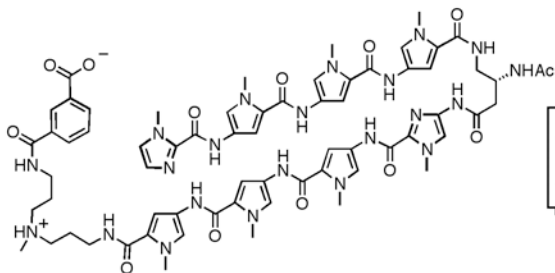

*Hairpin polyamide 5 (as shown in accompanying manuscript)*  
 Denoted as **DH-V-88** on ADMET Report

**Summary of results from ADMET study:**

Polyamides **1** and **5** were subjected to preclinical ADMET testing by contract service at Apredica (Watertown, MA). Shown below (I-VII) are summaries of the ADMET results taken directly from the final report provided by Apredica. The full ADMET report, which includes experimental conditions, can be accessed via the Dervan laboratory homepage at <http://dervan.caltech.edu>.

(I) Caco-2 permeability:

**4.2.1 Caco-2 permeability summary**

| Client ID       | test conc (μM) | Assay duration (hr) | mean A->B $P_{app}^a$ ( $10^{-6} \text{ cm s}^{-1}$ ) | mean A->B $P_{app}^a$ ( $10^{-6} \text{ cm s}^{-1}$ ) | Asymmetry ratio <sup>b</sup> | comment                   |
|-----------------|----------------|---------------------|-------------------------------------------------------|-------------------------------------------------------|------------------------------|---------------------------|
| Warfarin        | 50             | 2                   | 35.4                                                  | 7.9                                                   | 0.2                          | high permeability control |
| Ranitidine      | 50             | 2                   | 1.4                                                   | 2.4                                                   | 1.7                          | low permeability control  |
| <b>DH-V-88</b>  | 10             | 2                   | ND                                                    | 0.11                                                  | UD                           |                           |
| <b>DMC2-239</b> | 10             | 2                   | ND                                                    | ND                                                    | ND                           |                           |

<sup>a</sup>Apparent permeability

<sup>b</sup> $P_{app}(B \rightarrow A) / P_{app}(A \rightarrow B)$

ND = no compound detected in receiver solution

(II) Cytotoxicity in HepG2 cells:

#### 4.2.2 Cytotoxicity summary

| Client ID      | Cell line | IC <sub>50</sub> (μM) | comment                 |
|----------------|-----------|-----------------------|-------------------------|
| Chlorpromazine | HepG2     | 13                    | Higly cytotoxic control |
| Propranolol    | HepG2     | 80                    | Low cytotoxic control   |
| DH-V-88        | HepG2     | >100                  |                         |
| DMC2-239       | HepG2     | >100                  |                         |

(III) Cyp inhibition:

#### 4.2.3 Fluorescent Cyp IC<sub>50</sub> summary

| Client ID | IC <sub>50</sub> (μM)            |                         |                         |                         |                    |                          |                          |
|-----------|----------------------------------|-------------------------|-------------------------|-------------------------|--------------------|--------------------------|--------------------------|
|           | Cyp1A2 / CEC                     | Cyp2C8/D BF             | Cyp2C9 / DBF            | Cyp2C19 / DBF           | Cyp2D6 / AMMC      | Cyp3A4 / BFC             | Cyp3A4 / DBF             |
| Controls  | 0.2<br><i>α</i> -naphtho-flavone | 2.3<br>ketoconazol<br>e | 1.1<br>sulpha-phenazole | 5.6<br>tranyl-cypramine | 0.05<br>quinindine | 1.26<br>ketoconazol<br>e | 1.26<br>ketoconazol<br>e |
| DH-V-88   | >50                              | >50                     | >50                     | >50                     | >50                | 47.6                     | >50                      |
| DMC2-239  | >50                              | >50                     | >50                     | >50                     | >50                | 37.7                     | >50                      |

(IV) hERG inhibition:

#### 4.2.4 hERG FastPatch summary

| Client ID | IC <sub>50</sub> (μM) | comment          |
|-----------|-----------------------|------------------|
|           | 99% at 0.5 μM         |                  |
| E-4031    |                       | positive control |
| DH-V-88   | >100                  | *                |
| DMC2-239  | >100                  | *                |

\*The solubility limit for this experiment, as determined by vehicle controls, was 17.3 x 10<sup>3</sup> LSU (horizontal black line). Based on the data obtained, there may be solubility issues for both test articles at 30 and 100 μM in our physiological saline solution (HB-PS, 0.3%DMSO). Precipitation of DH-V-88 at 100 μM was visible to the naked eye.

(V) Liver microsome stability:

#### 4.2.5 Microsomal intrinsic clearance summary

| Client ID | test conc (µM) | test species | NADPH-dependent CL <sub>int</sub> <sup>a</sup> (µl min <sup>-1</sup> mg <sup>-1</sup> ) | NADPH-dependent T <sub>1/2</sub> <sup>b</sup> (min) | NADPH-free CL <sub>int</sub> <sup>a</sup> (µl min <sup>-1</sup> mg <sup>-1</sup> ) | NADPH-free T <sub>1/2</sub> <sup>b</sup> (min) | comment                 |
|-----------|----------------|--------------|-----------------------------------------------------------------------------------------|-----------------------------------------------------|------------------------------------------------------------------------------------|------------------------------------------------|-------------------------|
| Verapamil | 1              | Human        | 411.3                                                                                   | 5.6                                                 | 0.6                                                                                | >180                                           | metabolized control     |
| Verapamil | 1              | Rat          | 2276                                                                                    | 1                                                   | 0.0                                                                                | >180                                           | metabolized control     |
| Warfarin  | 1              | Human        | 0.0                                                                                     | >180                                                | 0.0                                                                                | >180                                           | non-metabolized control |
| Warfarin  | 1              | Rat          | 0.0                                                                                     | >180                                                | 0.0                                                                                | >180                                           | non-metabolized control |
| DH-V-88   | 5              | Human        | 0.0                                                                                     | >180                                                | 0.0                                                                                | >180                                           |                         |
| DH-V-88   | 5              | Rat          | 0.0                                                                                     | >180                                                | 0.0                                                                                | >180                                           |                         |
| DMC2-239  | 5              | Human        | 0.0                                                                                     | >180                                                | 0.0                                                                                | >180                                           |                         |
| DMC2-239  | 5              | Rat          | 0.0                                                                                     | >180                                                | 0.0                                                                                | >180                                           |                         |

<sup>a</sup>Microsomal Intrinsic Clearance

<sup>b</sup>Half-life

(VI) Plasma half-life:

#### 4.2.6 Plasma half-life summary

| Compound       | test conc (µM) | medium       | T1/2 (min) | Fraction remaining, max time (%) | comment |
|----------------|----------------|--------------|------------|----------------------------------|---------|
| Proprantheline | 10.0           | Human Plasma | 35.5       | 5.8%                             | control |
| Proprantheline | 10.0           | Rat Plasma   | 149.0      | 51.6%                            | control |
| DH-V-88        | 10.0           | Human Plasma | >120       | 95.6%                            |         |
| DH-V-88        | 10.0           | Rat Plasma   | >120       | 94.0%                            |         |
| DMC2-239       | 10.0           | Human Plasma | >120       | 124.5%                           |         |
| DMC2-239       | 10.0           | Rat Plasma   | >120       | 120.3%                           |         |

<sup>a</sup>Half-life

(VII) Plasma protein binding:

#### 4.2.7 Plasma protein binding summary

| Client ID       | test conc (µM) | Assay duration | Species | Mean free fraction (%) | comment              |
|-----------------|----------------|----------------|---------|------------------------|----------------------|
| <b>Warfarin</b> | 10             | 4 hr           | Human   | 0.73%                  | high binding control |
| <b>Warfarin</b> | 10             | 4 hr           | Rat     | 5.47%                  | high binding control |
| <b>Atenolol</b> | 10             | 4 hr           | Human   | 76.2%                  | low binding control  |
| <b>Atenolol</b> | 10             | 4 hr           | Rat     | 84.7%                  | low binding control  |
| <b>DH-V-88</b>  | 10             | 4 hr           | Human   | 0.0015%                |                      |
| <b>DH-V-88</b>  | 10             | 4 hr           | Rat     | 0.0016%                |                      |
| <b>DMC2-239</b> | 10             | 4 hr           | Human   | 0.0000%                |                      |
| <b>DMC2-239</b> | 10             | 4 hr           | Rat     | 0.0040%                |                      |

exp1 Proton

| SAMPLE    |                | SPECIAL    |          |
|-----------|----------------|------------|----------|
| date      | Oct 21 2008    | temp       | 23.0     |
| solvent   | dms            | gain       | not used |
| file      | /home/autouse~ | spin       | not used |
| r/vnmr    | sys/data/aut~  | hst        | 0.008    |
| o_2008    | 10.19/s_200~   | pw90       | 9.900    |
| 81020_22  | /data/Prot~    | alfa       | 6.600    |
| on_01.fid |                | FLAGS      |          |
| sw        | 8000.0         | il         | n        |
| at        | 2.048          | in         | n        |
| np        | 32762          | dp         | y        |
| fb        | not used       | hs         | nn       |
| bs        | 32             | lb         | 0.20     |
| ss        | 2              | fn         | 65536    |
| d1        | 1.000          | PROCESSING |          |
| nt        | 64             | sp         | -3.9     |
| ct        | 64             | wp         | 5999.8   |
| tn        | H1             | rfl        | 2248.3   |
| sfrq      | 499.772        | rfl        | 2248.3   |
| tof       | 499.6          | rfp        | 1244.4   |
| tpwr      | 61             | rp         | 41.8     |
| pw        | 4.950          | lp         | 7.6      |
| dn        | C13            | PLOT       |          |
| dof       | 0              | wc         | 240      |
| dm        | nnn            | sc         | 0        |
| dmm       | c              | vs         | 50       |
| dpwr      | 35             | th         | 6        |
| dmf       | 32258          | ai         | cdc ph   |

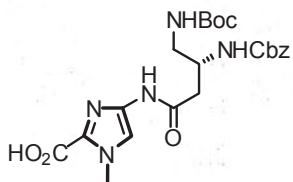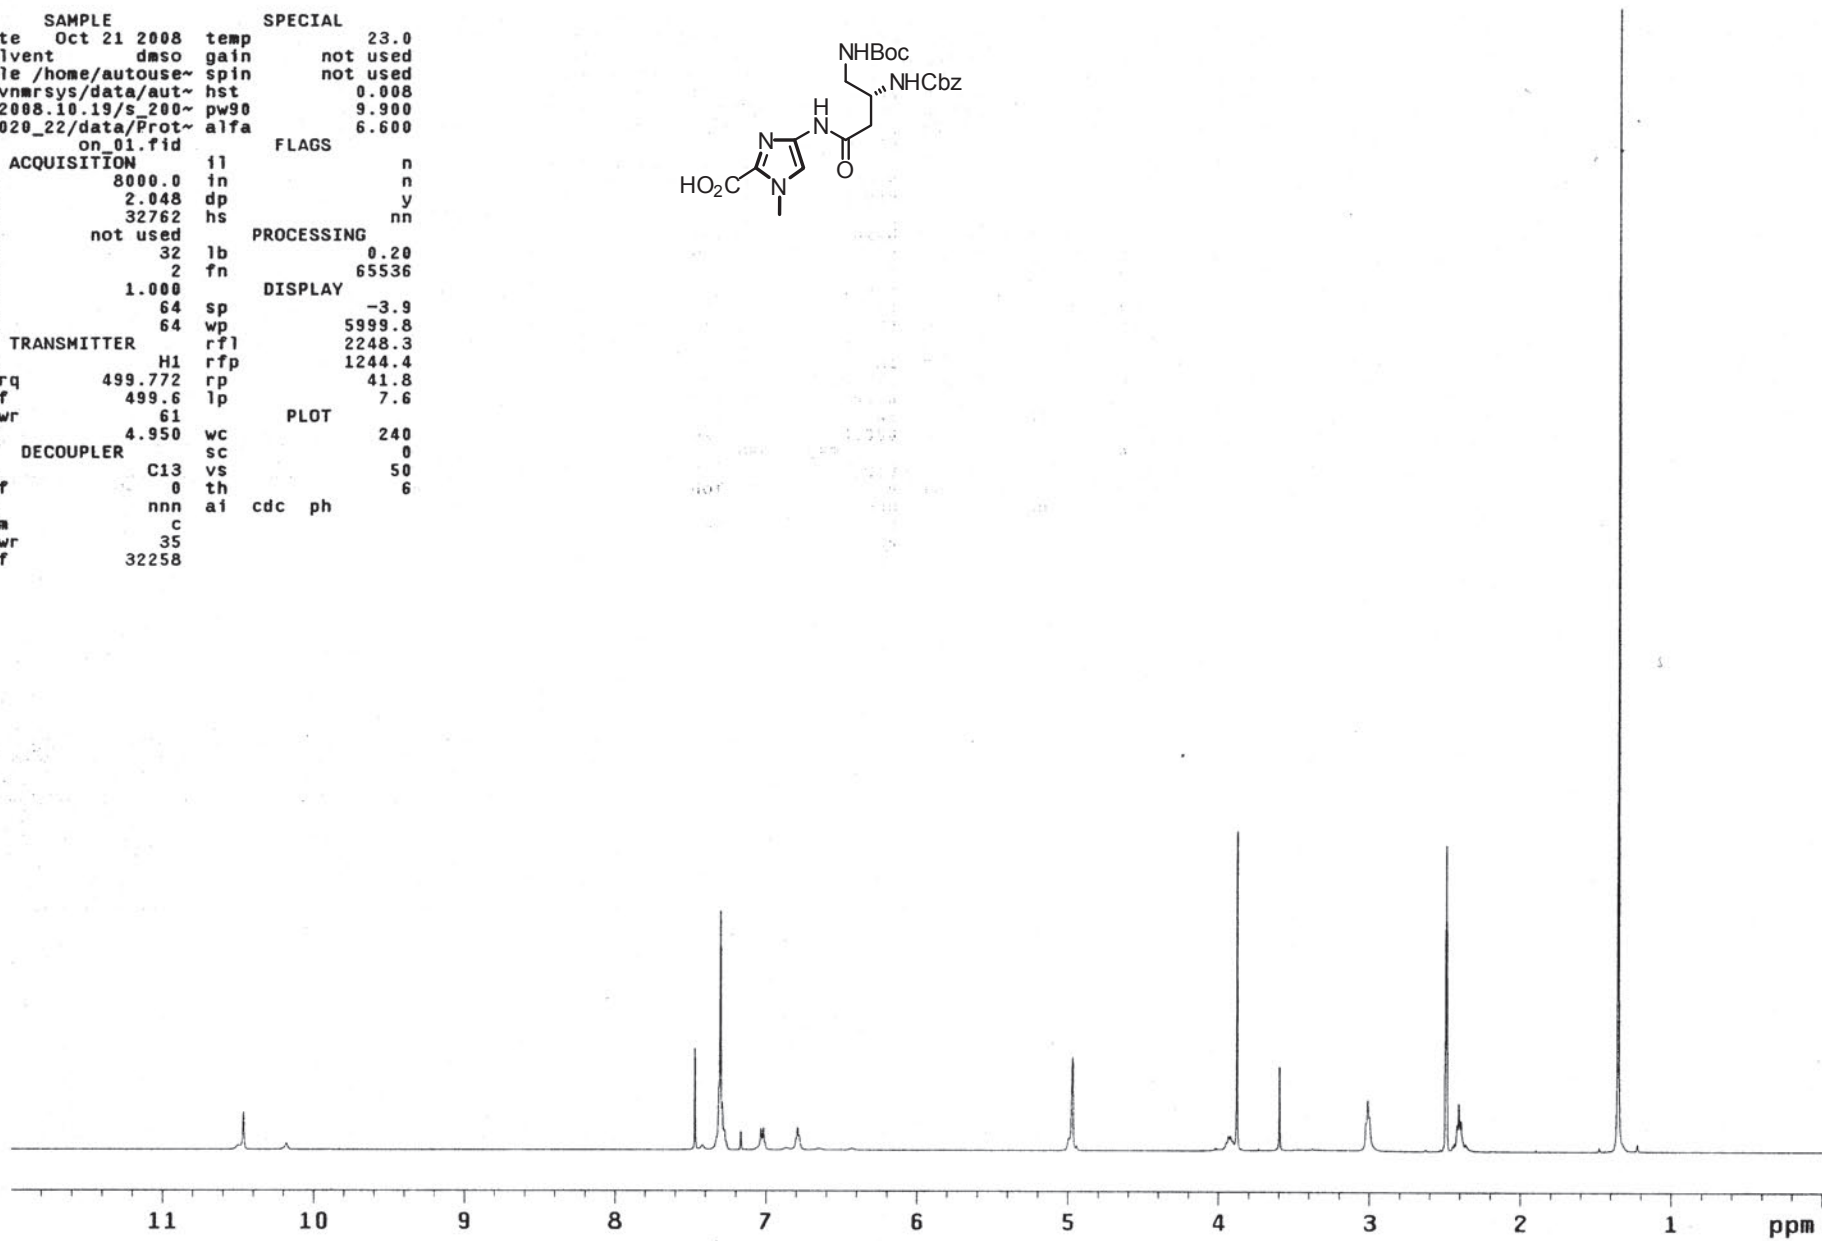

exp1 Carbon

| SAMPLE      |                | SPECIAL |          |
|-------------|----------------|---------|----------|
| date        | Oct 24 2008    | temp    | 23.0     |
| solvent     | dmsd           | gain    | 30       |
| file        | /home/autouse~ | spin    | not used |
| r/vnmr      | sys/data/aut~  | hst     | 0.008    |
| o_2008      | .10.22/s_200~  | pw90    | 8.500    |
| 81023_26    | /data/Carb~    | alfa    | 10.000   |
| on_01.fid   |                |         |          |
| ACQUISITION |                | FLAGS   |          |
| sw          | 30165.9        | il      | n        |
| at          | 1.300          | in      | n        |
| np          | 78430          | dp      | y        |
| fb          | not used       | hs      | nn       |
| bs          | 64             | lb      | 0.50     |
| d1          | 1.000          | fn      | not used |
| nt          | 4000           |         |          |
| ct          | 4000           | sp      | 11.5     |
| TRANSMITTER |                | DISPLAY |          |
| tn          | C13            | wp      | 25115.1  |
| sfrq        | 125.680        | rfl     | 6939.0   |
| tof         | 1255.2         | rfp     | 4963.8   |
| tpwr        | 56             | rp      | 99.0     |
| pw          | 4.250          | lp      | -93.9    |
| DECOUPLER   |                | PLOT    |          |
| dn          | H1             | wc      | 240      |
| dof         | 0              | sc      | 0        |
| dm          | yyy            | vs      | 40000    |
| dmm         | w              | th      | 7        |
| dpwr        | 39             | ai      | cdc ph   |
| dmf         | 11500          |         |          |

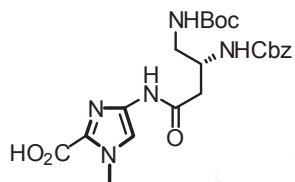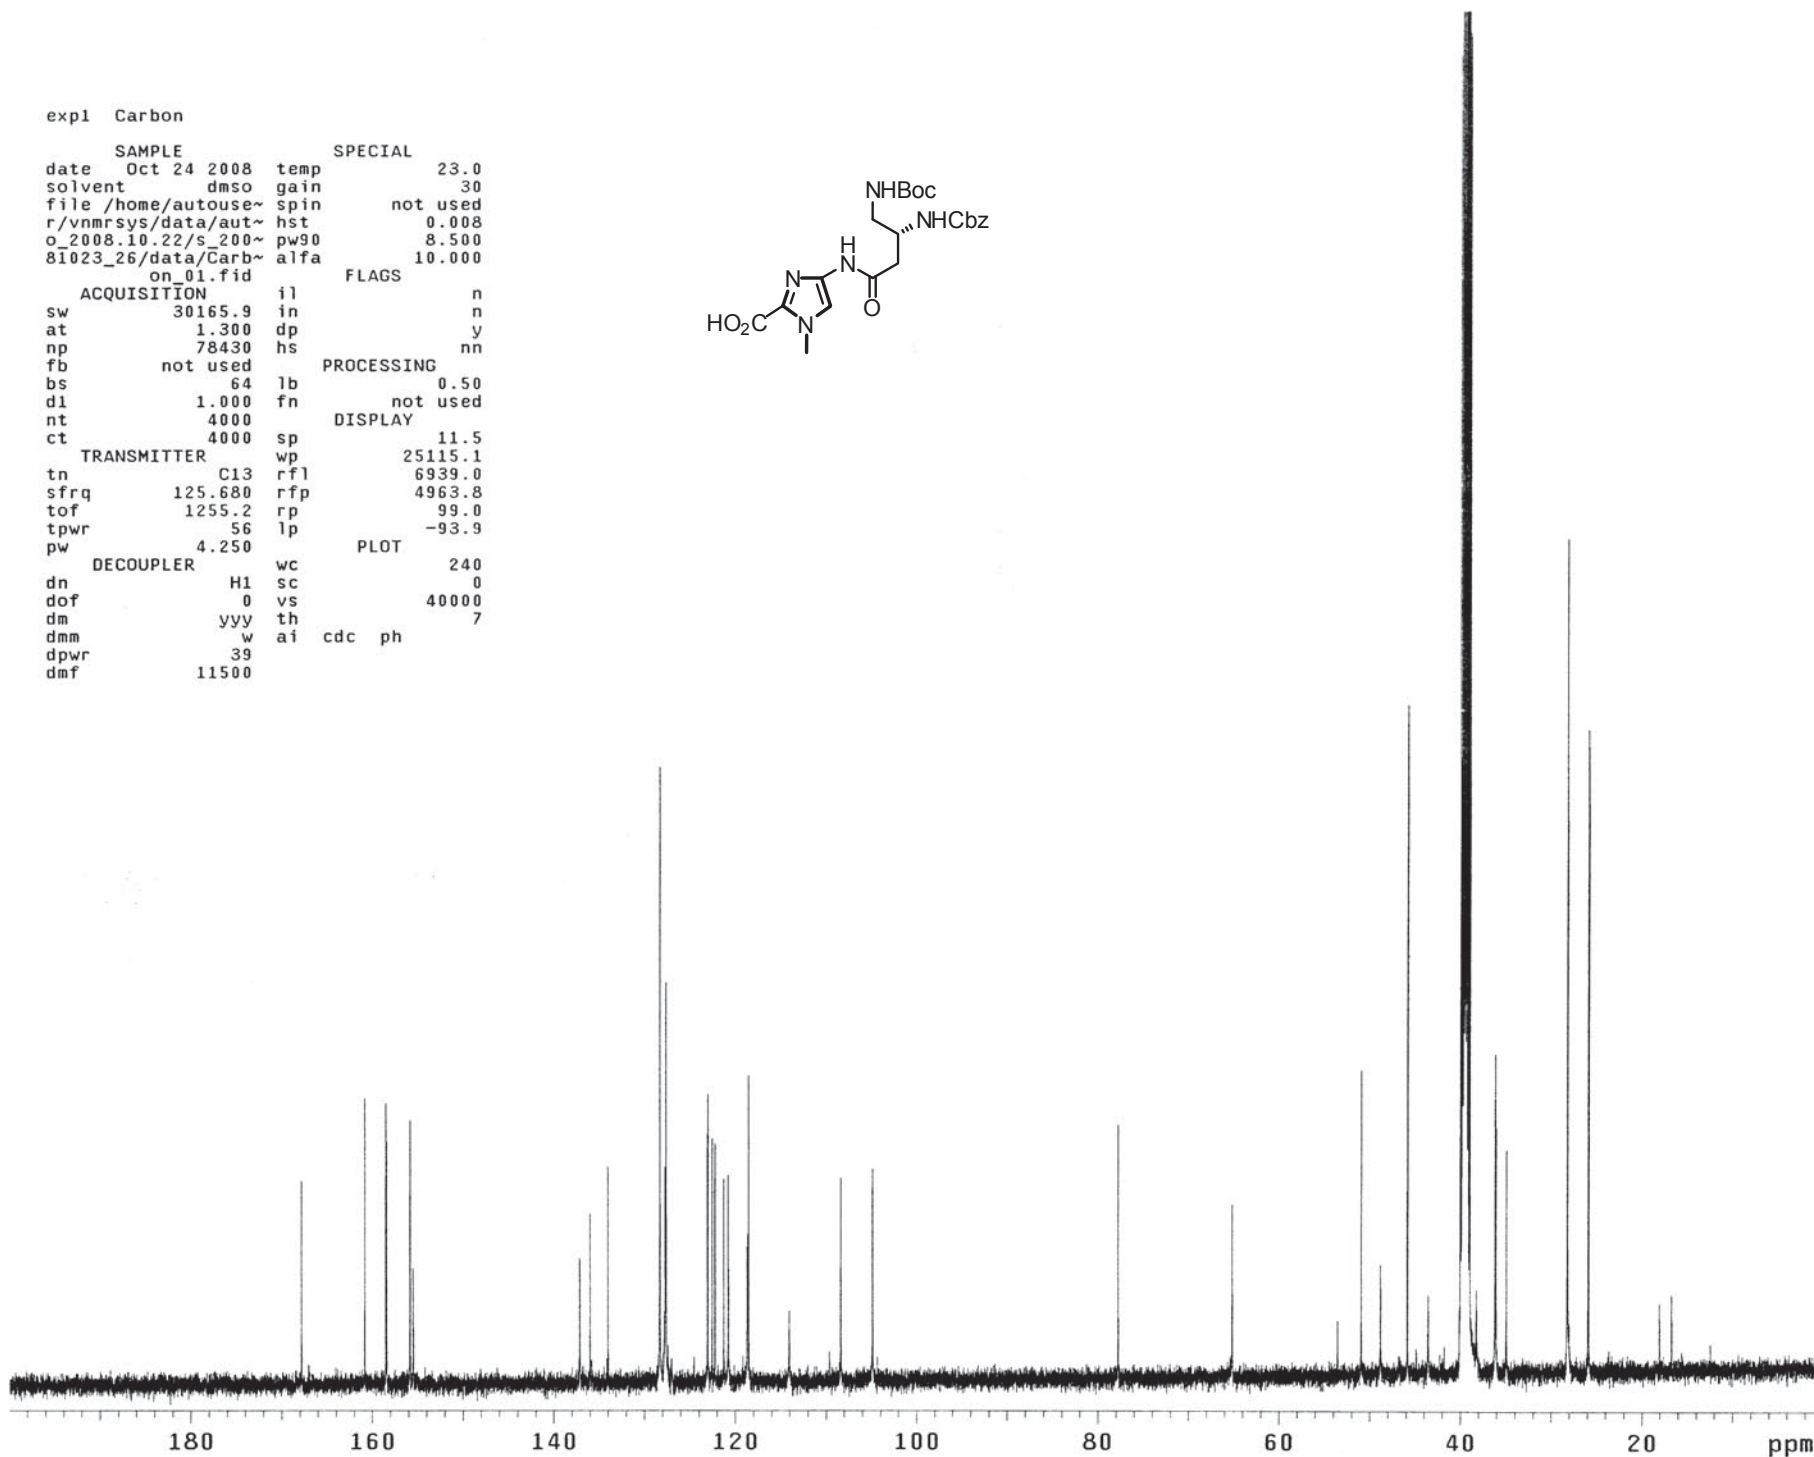





exp1 Carbon

|             |                |            |          |
|-------------|----------------|------------|----------|
| SAMPLE      |                | SPECIAL    |          |
| date        | Oct 24 2008    | temp       | 23.0     |
| solvent     | dmsd           | gain       | 30       |
| file        | /home/autouse~ | spin       | not used |
| r/vnmr      | sys/data/aut~  | hst        | 0.008    |
| o_2008      | .10.22/s_200~  | pw90       | 8.500    |
| 81023_26    | /data/Carb~    | alfa       | 10.000   |
| on_01.fid   |                | FLAGS      |          |
| ACQUISITION |                | il         | n        |
| sw          | 30165.9        | in         | n        |
| at          | 1.300          | dp         | y        |
| np          | 78430          | hs         | nn       |
| fb          | not used       | PROCESSING |          |
| bs          | 64             | lb         | 0.50     |
| d1          | 1.000          | fn         | not used |
| nt          | 4000           | DISPLAY    |          |
| ct          | 4000           | sp         | 11.5     |
| TRANSMITTER |                | wp         | 25115.1  |
| tn          | C13            | rfl        | 6939.0   |
| sfrq        | 125.680        | rfp        | 4963.8   |
| tof         | 1255.2         | rp         | 99.0     |
| tpwr        | 56             | lp         | -93.9    |
| pw          | 4.250          | PLOT       |          |
| DECOUPLER   |                | wc         | 240      |
| dn          | H1             | sc         | 0        |
| dof         | 0              | vs         | 40000    |
| dm          | yyy            | th         | 7        |
| dmm         | w              | ai         | cdc ph   |
| dpwr        | 39             |            |          |
| dmf         | 11500          |            |          |

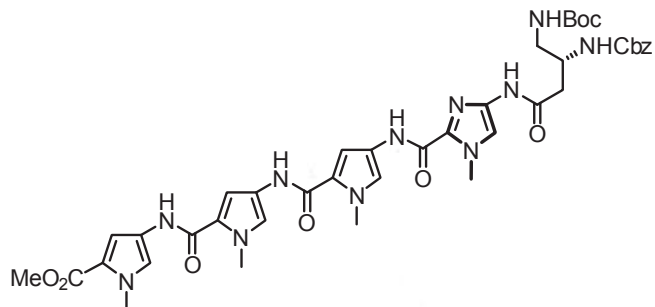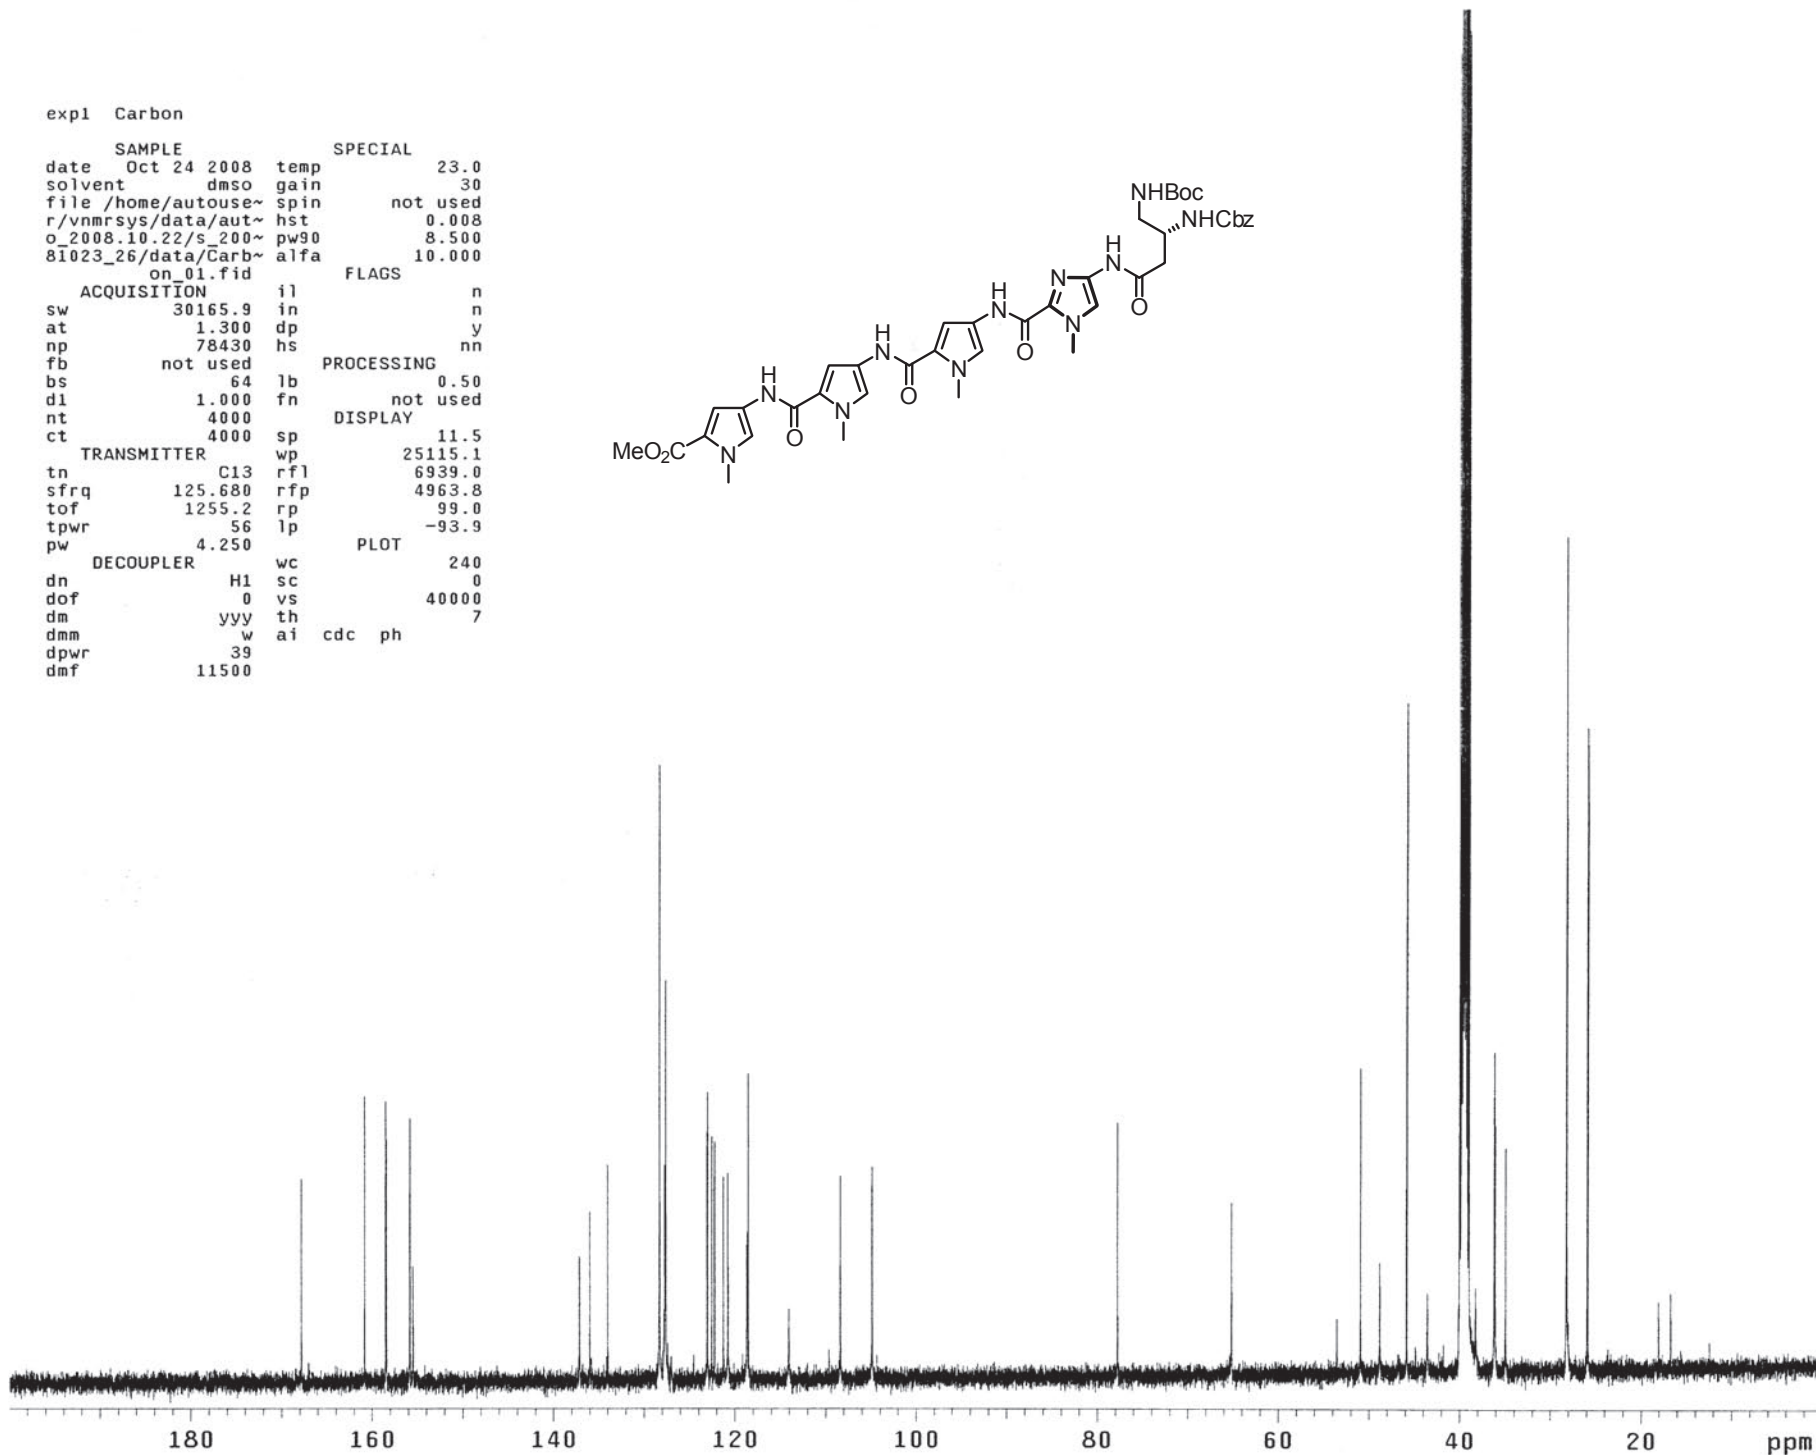

exp2 Proton

| SAMPLE              |                | SPECIAL    |          |
|---------------------|----------------|------------|----------|
| date                | Dec 12 2008    | temp       | 25.0     |
| solvent             | dms0           | gain       | not used |
| file                | /home/autouse~ | spin       | 20       |
| r/vnmr              | sys/data/aut~  | hst        | 0.008    |
| o_2008.12.10/s_200~ |                | pw90       | 9.900    |
| 8I212_02/data/Prot~ |                | alfa       | 6.600    |
| on_01.fid           |                | FLAGS      |          |
| ACQUISITION         |                | il         | n        |
| sw                  | 8000.0         | in         | n        |
| at                  | 2.048          | dp         | y        |
| np                  | 32762          | hs         | nn       |
| fb                  | not used       | PROCESSING |          |
| bs                  | 32             | lb         | 0.20     |
| ss                  | 2              | fn         | 65536    |
| d1                  | 1.000          | DISPLAY    |          |
| nt                  | 1024           | sp         | -0.9     |
| ct                  | 1024           | wp         | 5994.9   |
| TRANSMITTER         |                | rfl        | 2247.8   |
| tn                  | H1             | rfp        | 1244.4   |
| sfrq                | 499.772        | rp         | 132.1    |
| tof                 | 499.6          | lp         | 5.1      |
| tpwr                | 61             | PLOT       |          |
| pw                  | 4.950          | wc         | 240      |
| DECOUPLER           |                | sc         | 0        |
| dn                  | C13            | vs         | 250      |
| dof                 | 0              | th         | 11       |
| dm                  | nnn            | ai         | cdc ph   |
| dmm                 | c              |            |          |
| dpwr                | 35             |            |          |
| dmf                 | 32258          |            |          |

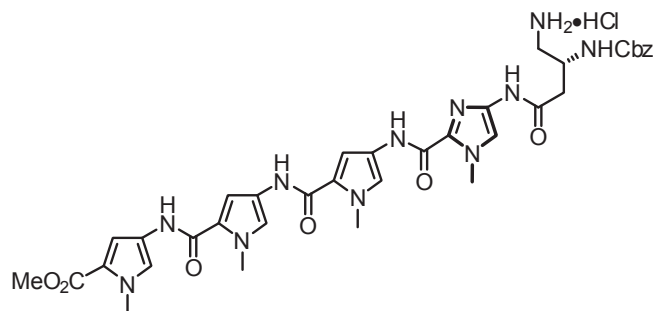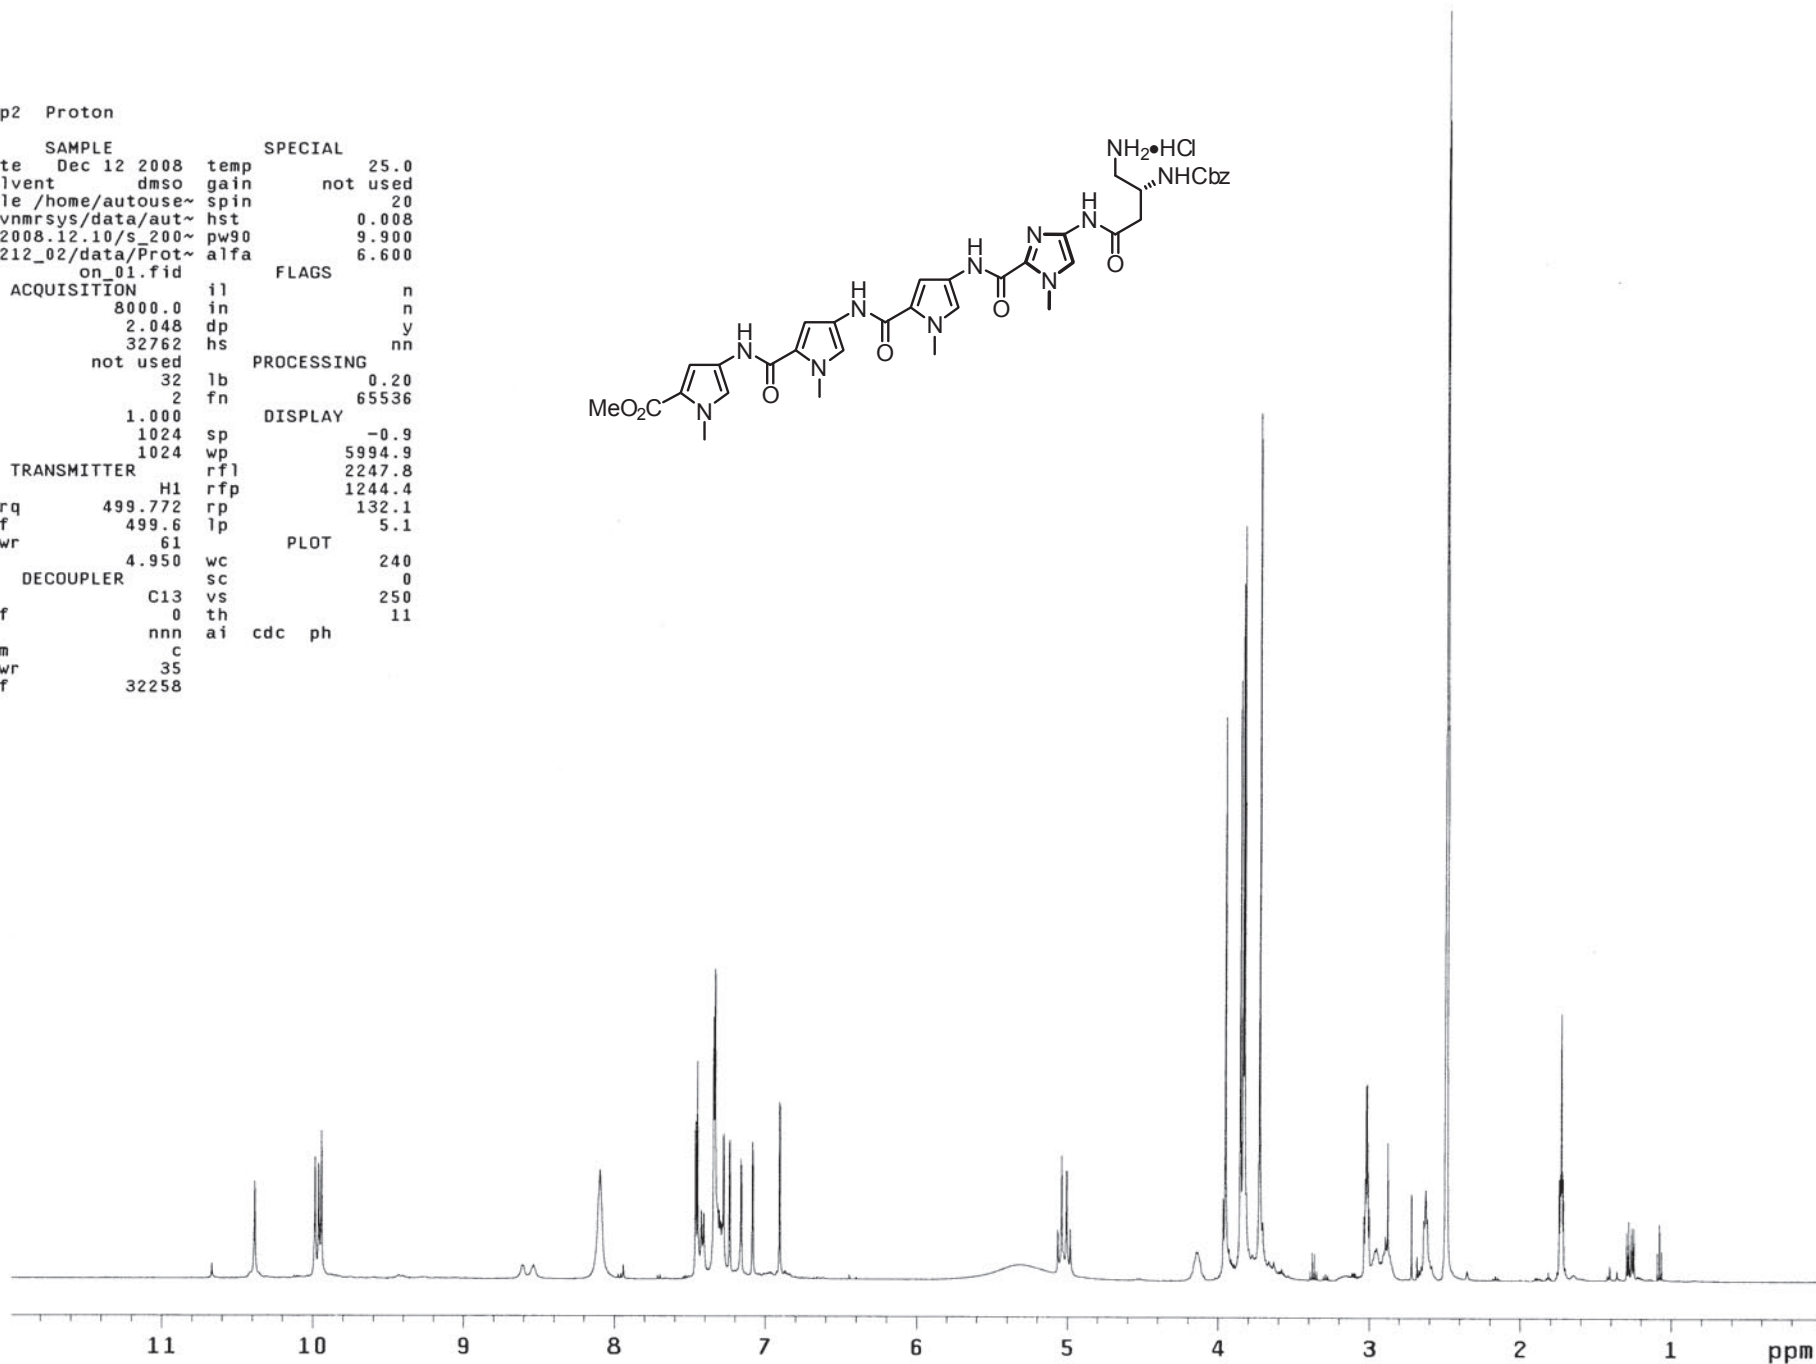

exp2 Carbon

|             |                  |            |          |
|-------------|------------------|------------|----------|
| SAMPLE      |                  | SPECIAL    |          |
| date        | Jan 15 2009      | temp       | 25.0     |
| solvent     | dms              | gain       | 30       |
| file        | /home/au3/vnm~   | spin       | 20       |
| rsys        | /data/auto_200~  | hst        | 0.008    |
|             | 9.01.13/0302.fid | pw90       | 8.500    |
| ACQUISITION |                  | alfa       | 10.000   |
| sw          | 30154.5          | FLAGS      |          |
| at          | 1.300            | il         | n        |
| np          | 78430            | in         | n        |
| fb          | 17000            | dp         | y        |
| bs          | 64               | hs         | nn       |
| d1          | 1.000            | PROCESSING |          |
| nt          | 12000            | lb         | 0.50     |
| ct          | 12000            | fn         | not used |
| TRANSMITTER |                  | DISPLAY    |          |
| tn          | C13              | sp         | -48.2    |
| sfrq        | 125.680          | wp         | 25181.1  |
| tof         | 1255.2           | rfl        | 1882.2   |
| tpwr        | 56               | rpf        | 0        |
| pw          | 4.250            | rp         | -111.8   |
|             |                  | lp         | -165.8   |
| DECOUPLER   |                  | PLOT       |          |
| dn          | H1               | wc         | 250      |
| dof         | 0                | sc         | 0        |
| dm          | yyy              | vs         | 99047    |
| dmm         | w                | th         | 25       |
| dpwr        | 39               |            |          |
| dmf         | 11500            | ai         | cdc ph   |

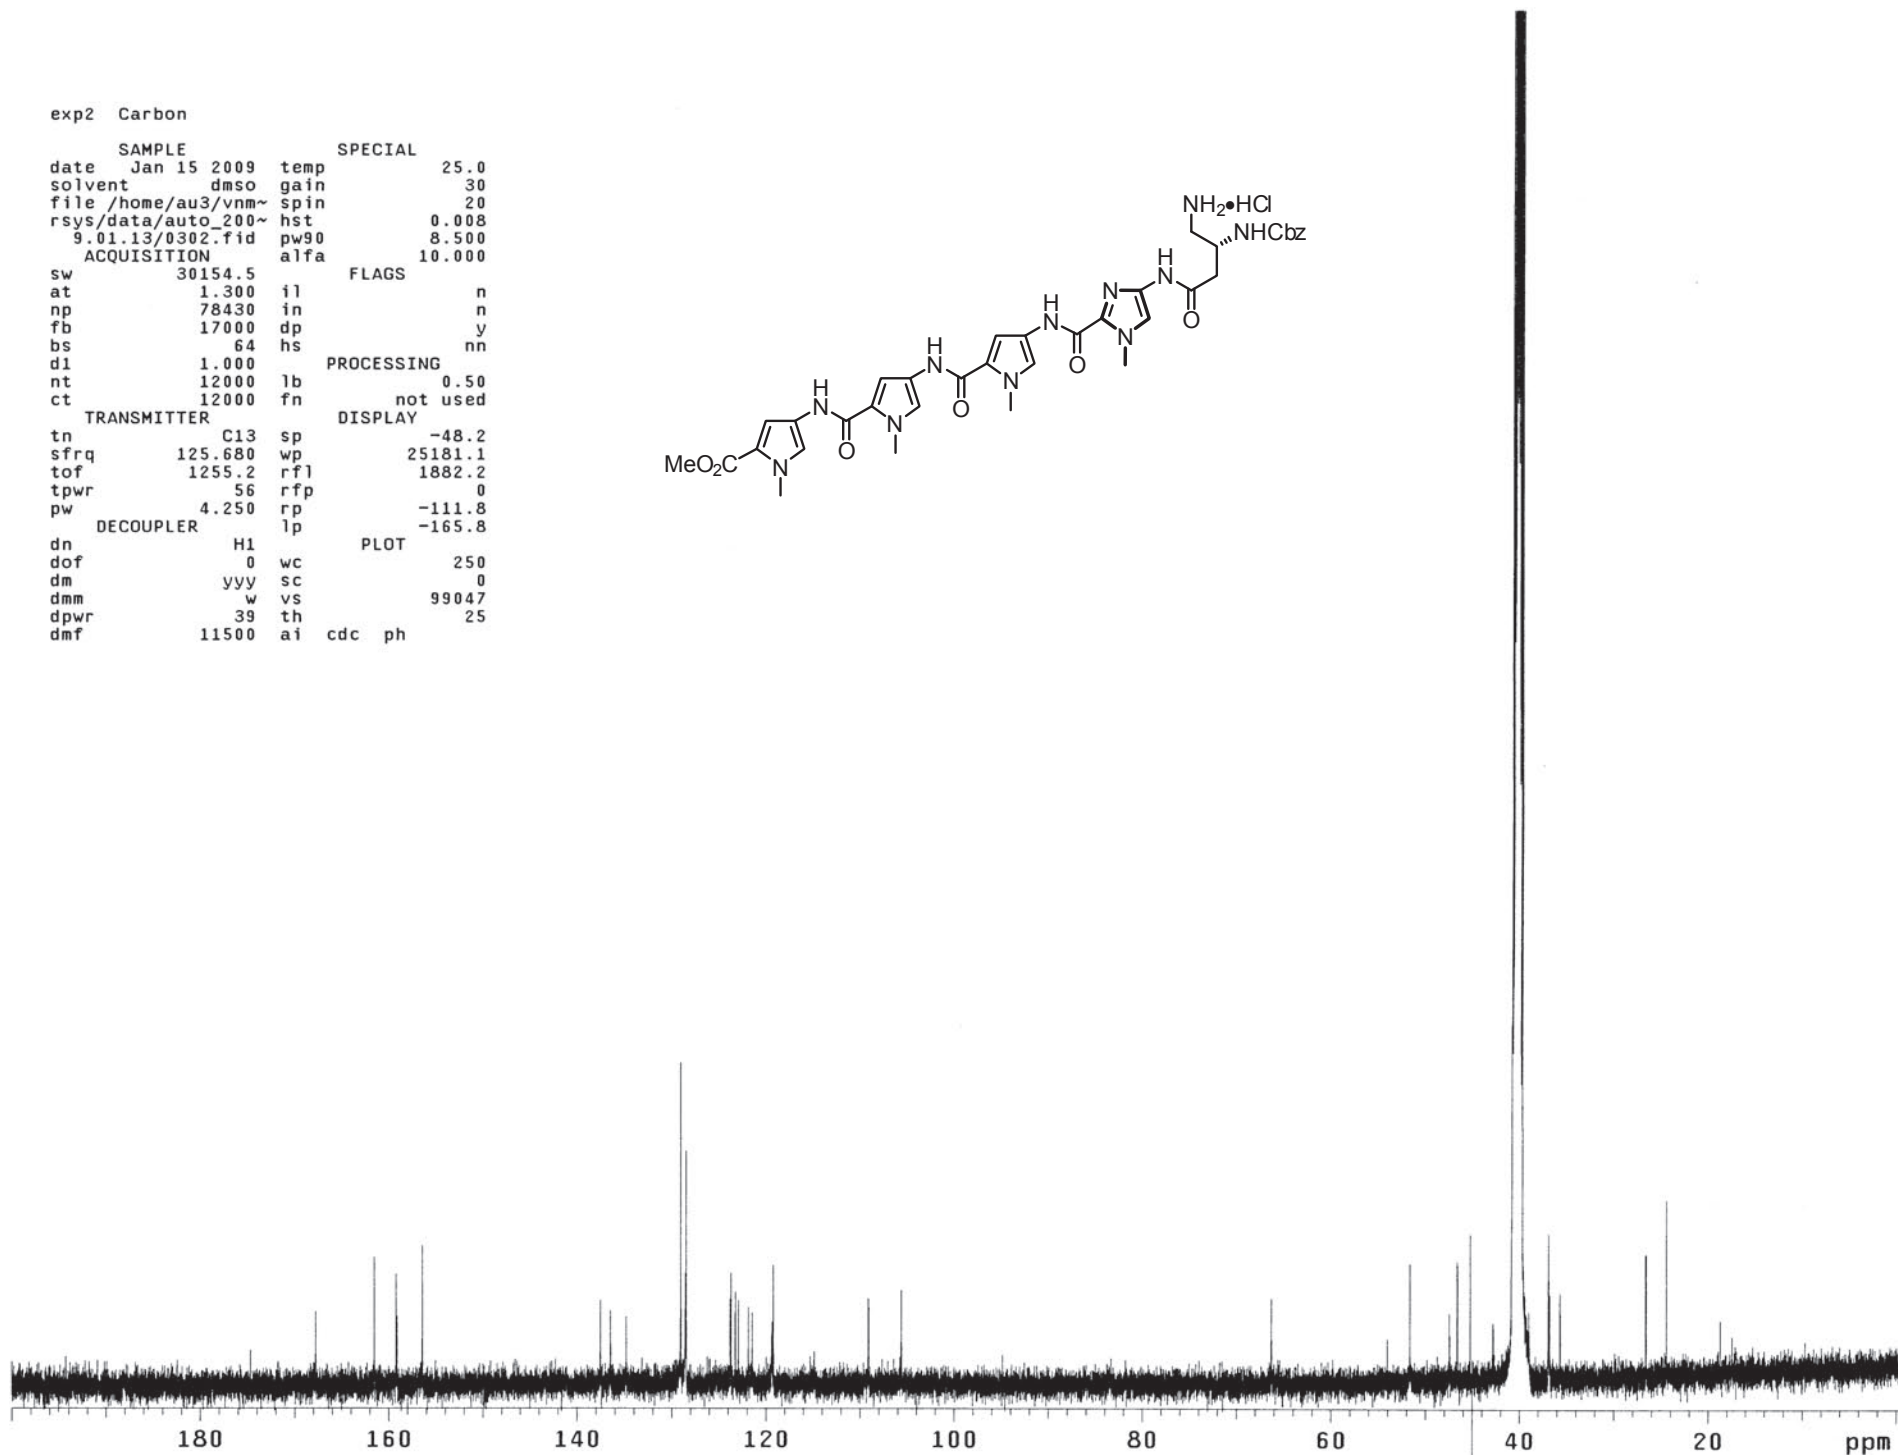





expl Proton

|             |                |            |          |
|-------------|----------------|------------|----------|
| SAMPLE      |                | SPECIAL    |          |
| date        | Dec 17 2008    | temp       | 25.0     |
| solvent     | dms            | gain       | not used |
| file        | /home/autouse~ | spin       | 20       |
| r/vnmr      | sys/data/aut~  | hst        | 0.008    |
| o_2008      | .12.14/s_200~  | pw90       | 9.900    |
| 81217_06    | /data/Prot~    | alfa       | 6.600    |
| on_01       | .fid           | FLAGS      |          |
| ACQUISITION |                | l1         | n        |
| sw          | 8000.0         | in         | n        |
| at          | 2.048          | dp         | y        |
| np          | 32762          | hs         | nn       |
| fb          | not used       | PROCESSING |          |
| bs          | 32             | lb         | 0.20     |
| ss          | 2              | fn         | 65536    |
| d1          | 1.000          | DISPLAY    |          |
| nt          | 1024           | sp         | -2.6     |
| ct          | 1024           | wp         | 5999.8   |
| TRANSMITTER |                | rfl        | 2247.1   |
| tn          | H1             | rfp        | 1244.4   |
| sfrq        | 499.772        | rp         | 136.2    |
| tof         | 499.6          | lp         | 2.7      |
| tpwr        | 61             | PLOT       |          |
| pw          | 4.950          | wc         | 240      |
| DECOUPLER   |                | sc         | 0        |
| dn          | C13            | vs         | 216      |
| dof         | 0              | th         | 2        |
| dm          | nnn            | ai         | cdc ph   |
| dmm         | c              |            |          |
| dpwr        | 35             |            |          |
| dmf         | 32258          |            |          |

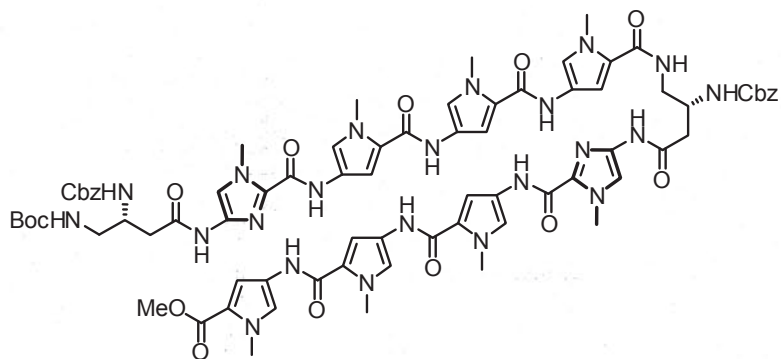









exp2 Proton

|             |                |            |          |
|-------------|----------------|------------|----------|
| SAMPLE      |                | SPECIAL    |          |
| date        | Dec 19 2008    | temp       | 25.0     |
| solvent     | dms            | gain       | not used |
| file        | /home/autouse~ | spin       | 20       |
| r/vnmr      | sys/data/aut~  | hst        | 0.008    |
| o_2008      | .12.18/s_200~  | pw90       | 9.900    |
| 81219_03    | /data/Prot~    | alfa       | 6.600    |
| on_01.fid   |                | FLAGS      |          |
| ACQUISITION |                | il         | n        |
| sw          | 8000.0         | in         | n        |
| at          | 2.048          | dp         | y        |
| np          | 32762          | hs         | nn       |
| fb          | not used       | PROCESSING |          |
| bs          | 32             | lb         | 0.20     |
| ss          | 2              | fn         | 65536    |
| d1          | 1.000          | DISPLAY    |          |
| nt          | 1024           | sp         | -19.7    |
| ct          | 1024           | wp         | 6004.6   |
| TRANSMITTER |                | rfl        | 2247.3   |
| tn          | H1             | rfp        | 1244.4   |
| sfrq        | 499.772        | rp         | 45.0     |
| tof         | 499.6          | lp         | 7.0      |
| tpwr        | 61             | PLOT       |          |
| pw          | 4.950          | wc         | 240      |
| DECOUPLER   |                | sc         | 0        |
| dn          | C13            | vs         | 250      |
| dof         | 0              | th         | 3        |
| dm          | nnn            | ai         | cdc ph   |
| dmm         | c              |            |          |
| dpwr        | 35             |            |          |
| dmf         | 32258          |            |          |

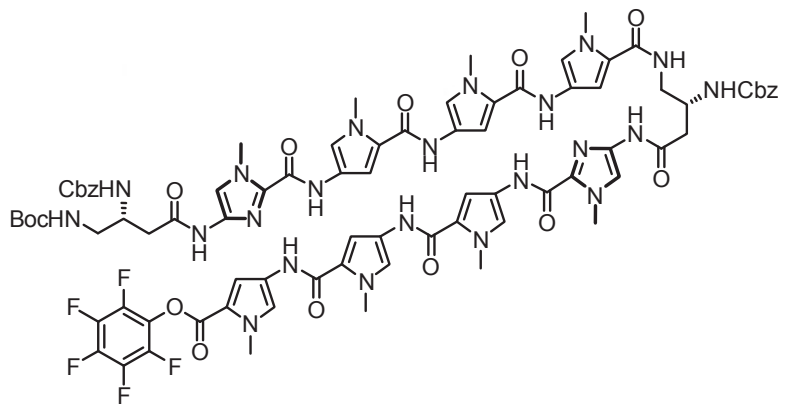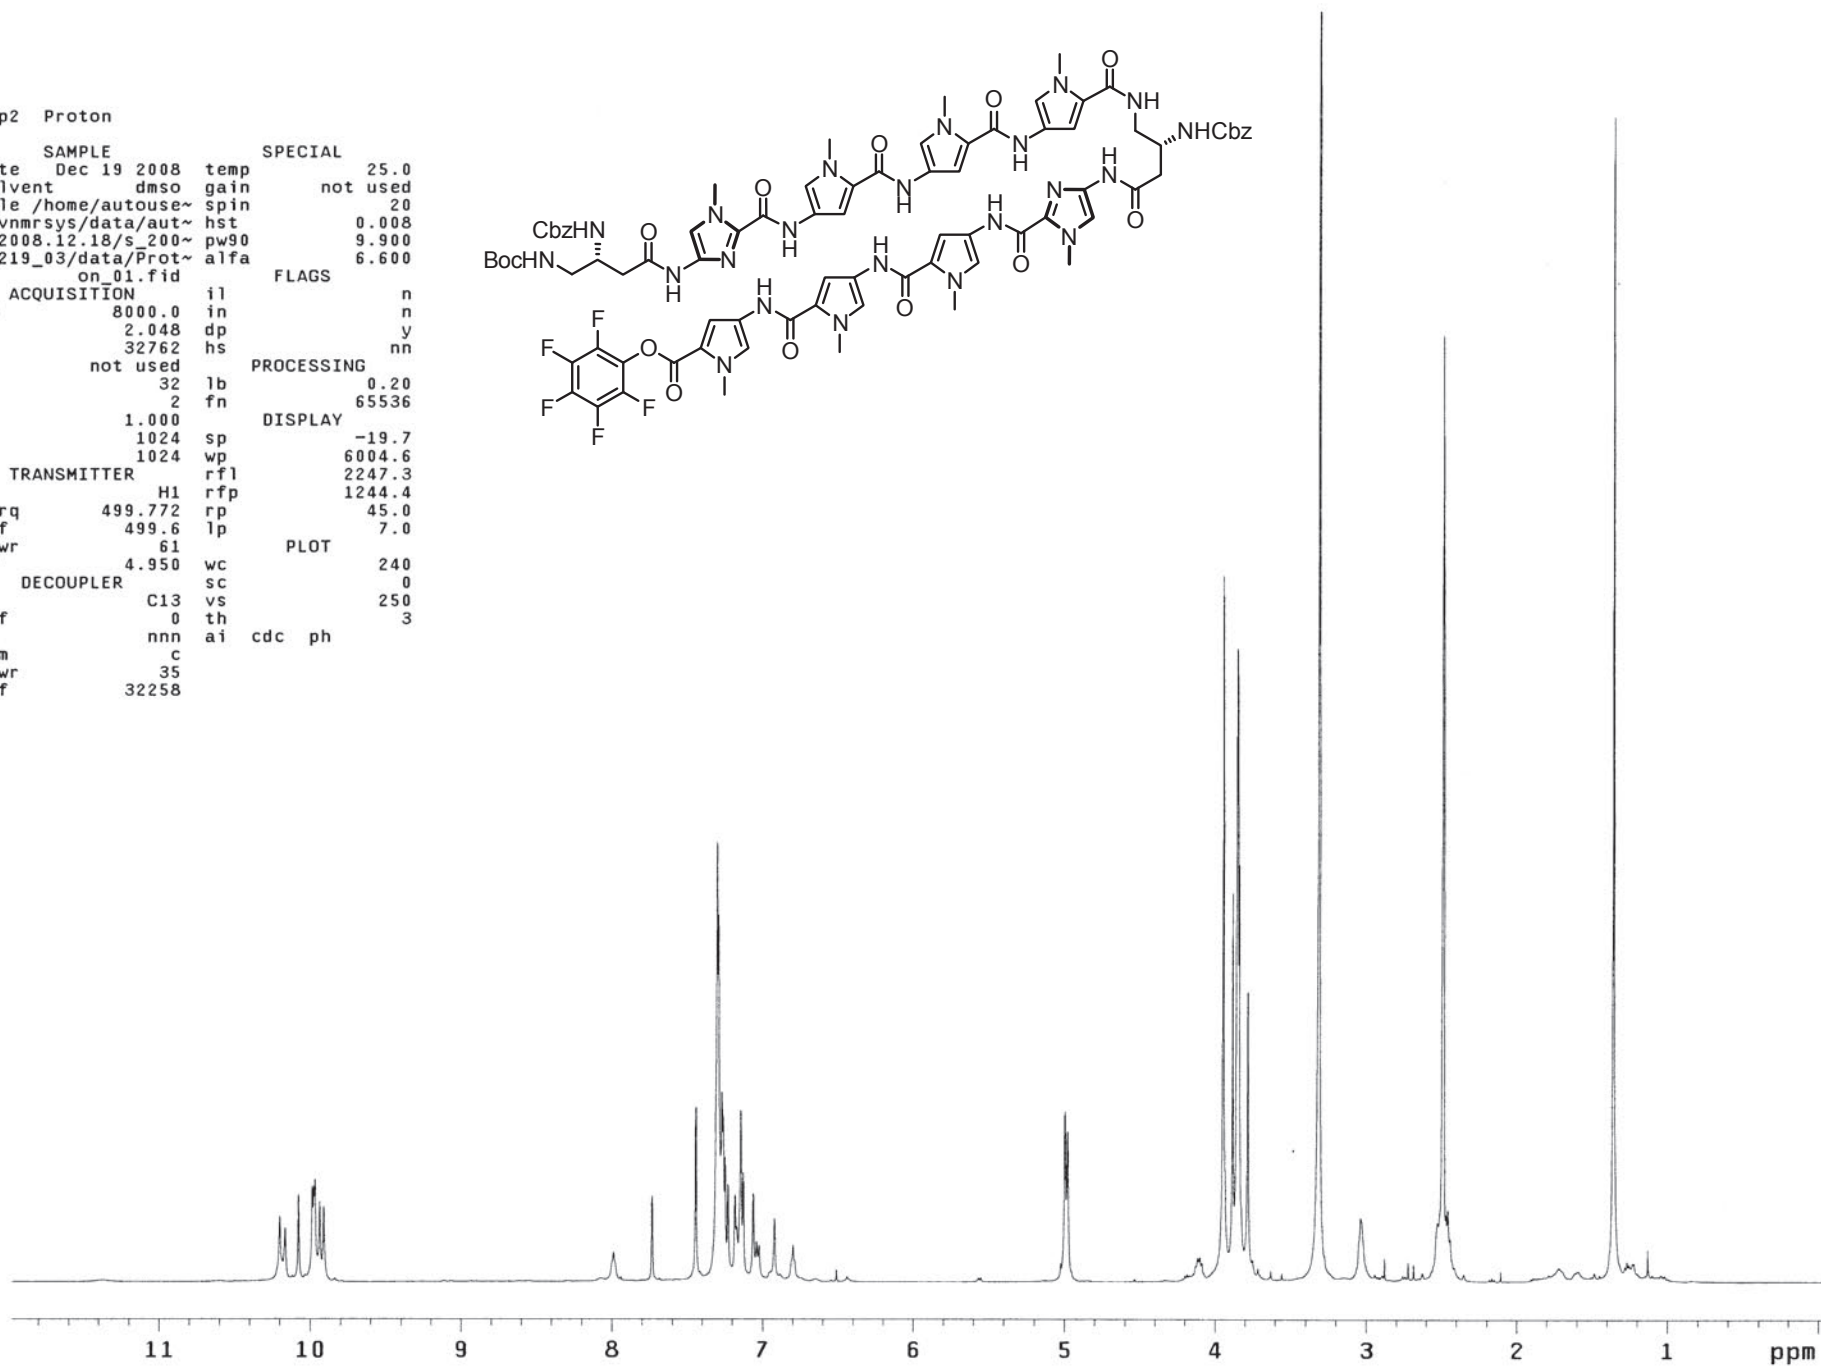

exp3 Proton

| SAMPLE      |                  | SPECIAL    |          |
|-------------|------------------|------------|----------|
| date        | Jan 20 2009      | temp       | 25.0     |
| solvent     | dmsd             | gain       | not used |
| file        | /home/au3/vnm~   | spin       | 20       |
| rsys        | /data/auto_200~  | hst        | 0.008    |
|             | 9.01.19/3201.fid | pw90       | 9.900    |
|             |                  | alfa       | 6.600    |
| ACQUISITION |                  | FLAGS      |          |
| sw          | 8000.0           |            |          |
| at          | 2.048            | il         | n        |
| np          | 32762            | in         | n        |
| fb          | not used         | dp         | y        |
| bs          | 32               | hs         | nn       |
| ss          | 2                |            |          |
| TRANSMITTER |                  | PROCESSING |          |
| tn          | H1               | wp         | -8.0     |
| sfrq        | 499.772          | rfl        | 6008.8   |
| tof         | 499.6            | rfp        | 2248.0   |
| tpwr        | 61               | rp         | 1244.4   |
| pw          | 4.950            | lp         | 142.2    |
|             |                  |            | -0.2     |
| DECOUPLER   |                  | PLOT       |          |
| dn          | C13              | wc         | 250      |
| dof         | 0                | sc         | 0        |
| dm          | nnn              | vs         | 1009     |
| dmm         | c                | th         | 1        |
| dpwr        | 35               | ai         | cdc      |
| dmf         | 32258            | ph         |          |

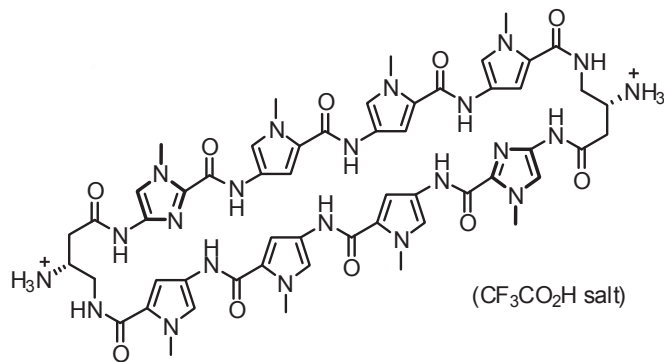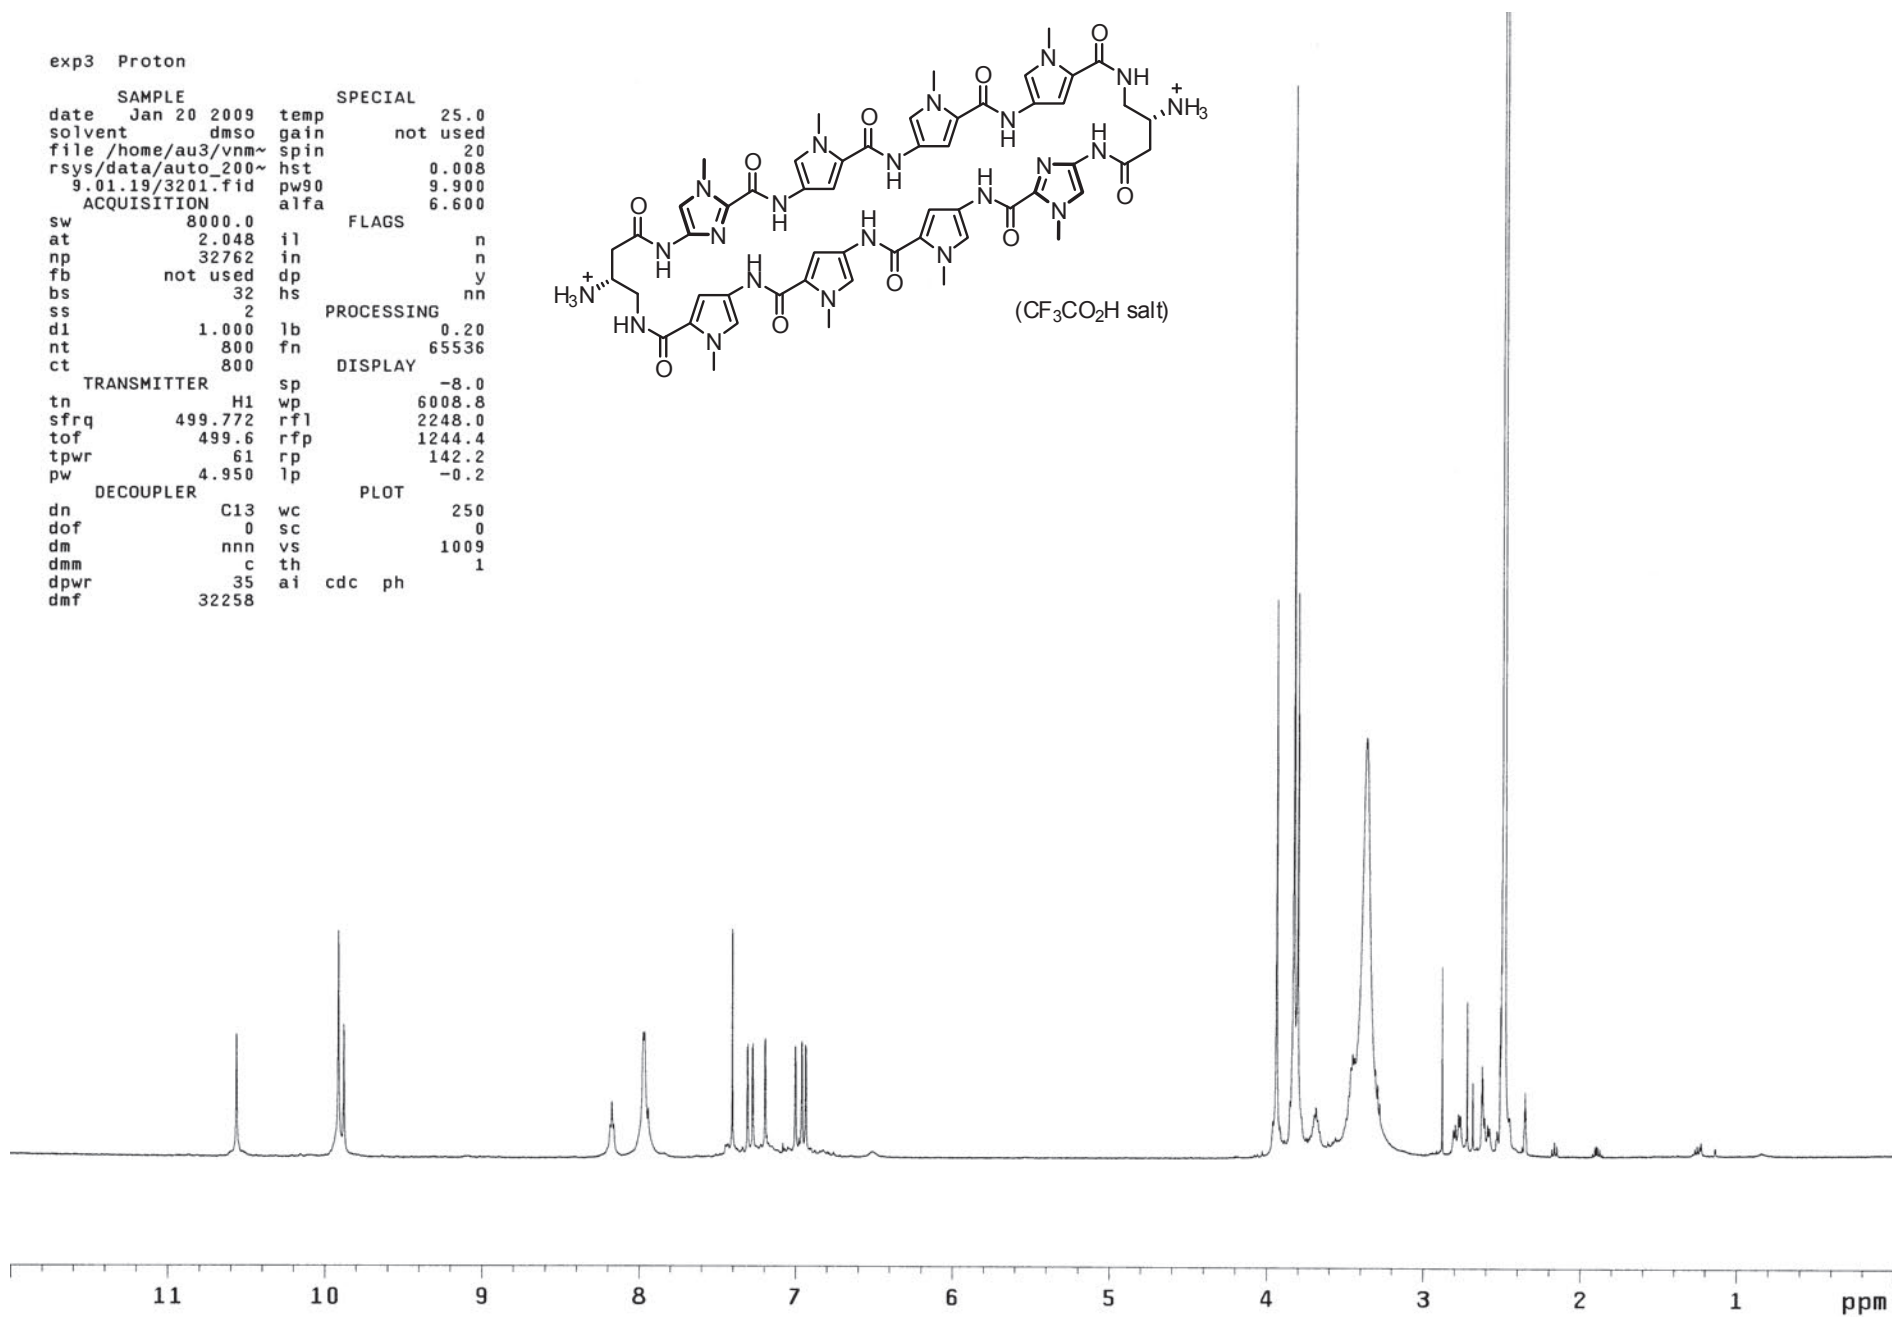

Analytical HPLC characterization of cyclic polyamide 15:

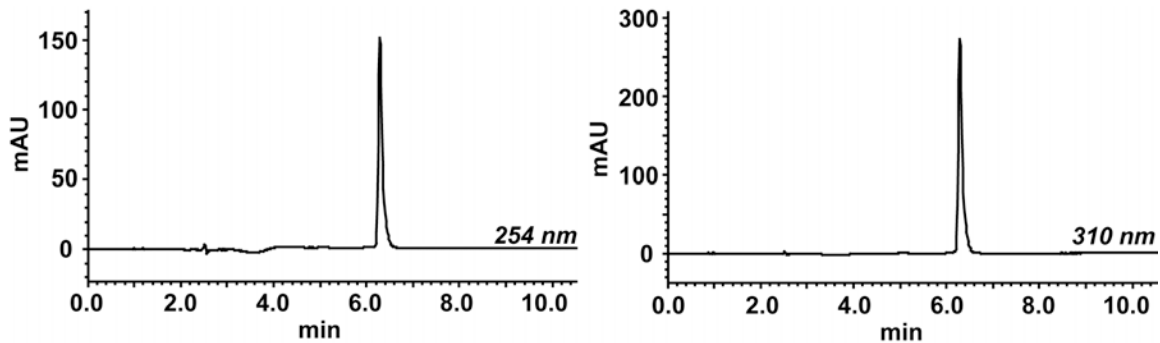

Analytical HPLC characterization of cyclic polyamide 1:

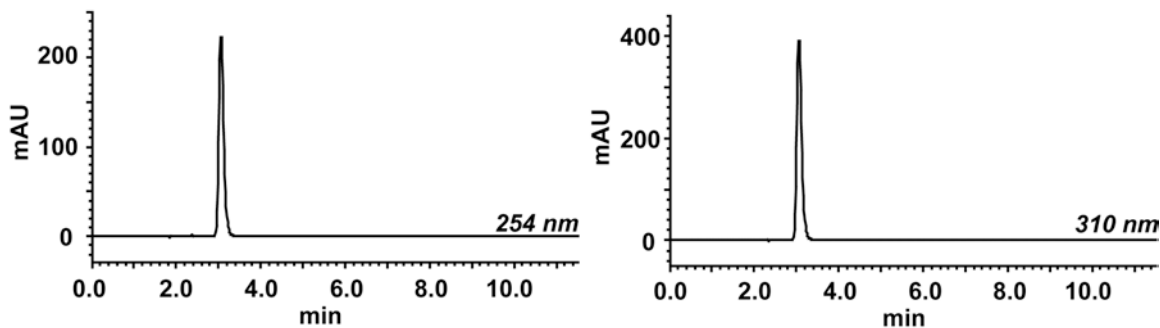

Analytical HPLC characterization of cyclic polyamide 2:

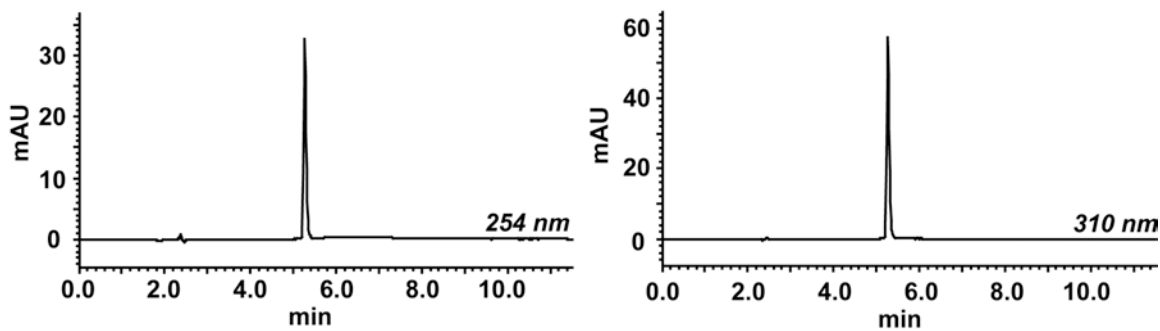

Analytical HPLC characterization of cyclic polyamide 3:

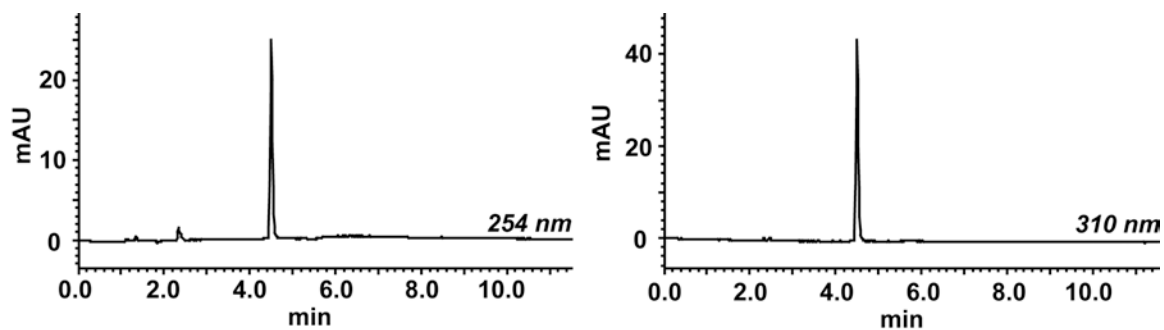

Analytical HPLC characterization of hairpin polyamide 5:

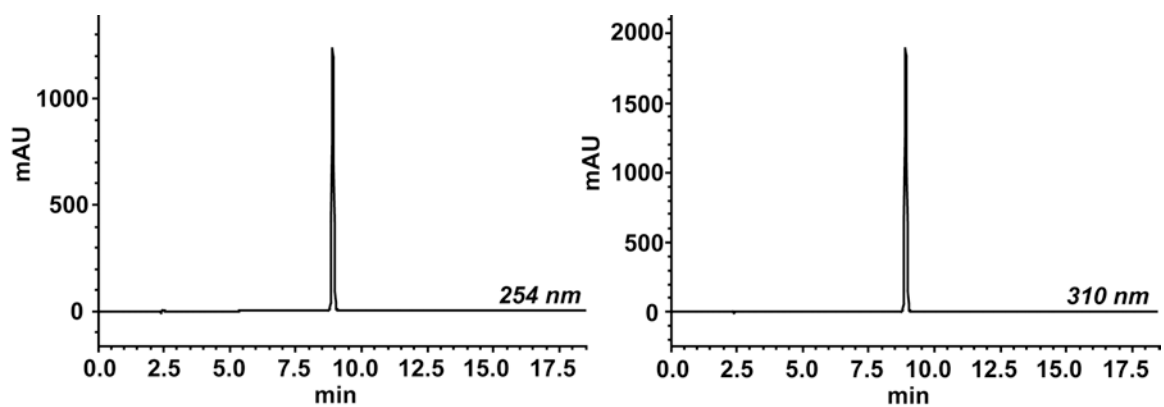

Supplement: NIHMS115453-supplement-1_si_001.pdf [file NIHMS115453-supplement-1_si_001.pdf]
